# Supplementary material
Source: PubMed Central journal article supplement (PMC3427128)
Supplement: 1201336109_pnas.1201336109_SI.pdf [file 1201336109_pnas.1201336109_SI.pdf]

# Supporting Information

Merlini et al. 10.1073/pnas.1201336109

## SI Text

The lattice for dolomite-II reported in the text ( $a = 4.7211$   $b = 5.5367$   $c = 7.1583$   $a_l = 103.333$   $b_e = 89.588$   $g_a = 92.79$  Vol = 181.85 at 19.5 GPa) and that of (1) are 'reducible' to an identical subcell lattice with a volume of approximately  $60 \text{ \AA}^3$ . This, then, is one-quarter of (1)'s lattice volume and one-third of the lattice volume reported herein.

Matrices for such a transformation are:

$0 \ 0 \ 1 \ \frac{1}{2} \ 0 \ 0 \ 0 \ \frac{1}{2} \ 0$  (for (1) → common sublattice)

$1 \ 0 \ 0 \ 0 \ 2/3 \ -1/3 \ 0 \ 1/3 \ 1/3$  (for triclinic → common sublattice)

They result in a pseudo-tetragonal 4.49 4.69 2.81 90 90 90 lattice.

Given that the triclinic lattice reported (demonstrable by crystal structure solution and refinement) has  $Z = 2$  (volume  $\sim 180 \text{ \AA}^3$ ), this implies that an effective  $Z$  for this sublattice (volume  $\sim 60 \text{ \AA}^3$ ) is  $2 * 1/3$  and the effective  $Z$  for the

lattice of (1) (volume  $\sim 240 \text{ \AA}^3$ ) is  $2 * 1/3 * 4 = 8/3$  (2.666). The equivalent volume for a  $Z = 3$  lattice, is therefore approximately  $\sim 240 \text{ \AA}^3 / (2.666) * 3 = \sim 270 \text{ \AA}^3$ , on the line extending from the dolomite-I compression, at about 20 GPa, with no, or little, volume change on transition from dolomite-I to dolomite-II.

An alternative possibility of indexing dolomite-II, from data in (1), is:

V = 188.6, M20 = 10.5, Cell = 7.212 5.743 4.69 90 90 103.82

Wavelength: 0.33440

Angular Tolerance: 0.150

Nb of calculated lines: 118

Nb of observed lines: 18

Nb of indexed lines: 18

1. Mao Z, et al. (2011) Dolomite III: A new candidate lower mantle carbonate. *Geophys Res Lett* 38:L22303.

| N  | h  | k  | l | 2 $\theta$ Obs | 2 $\theta$ Calc | Dif    |
|----|----|----|---|----------------|-----------------|--------|
| 1  | 0  | -1 | 1 | 5.332          | 5.340           | -0.008 |
| 2  | -2 | 0  | 0 | 5.462          | 5.474           | -0.012 |
| 3  | -2 | 0  | 1 | 6.832          | 6.833           | -0.001 |
| 4  | -2 | 1  | 1 | 7.036          | 7.037           | -0.001 |
| 5  | -2 | -1 | 0 | 7.121          | 7.127           | -0.006 |
| 6  | 0  | 0  | 2 | 8.183          | 8.177           | 0.005  |
| 7  | 2  | 1  | 1 | 8.320          | 8.218           | 0.103  |
| 8  | -1 | 1  | 2 | 9.041          | 9.040           | 0.001  |
| 9  | 3  | 0  | 1 | 9.186          | 9.178           | 0.009  |
| 10 | -2 | 0  | 2 | 9.836          | 9.845           | -0.010 |
| 11 | -3 | 2  | 1 | 10.160         | 10.227          | -0.068 |
| 12 | -4 | 1  | 0 | 10.663         | 10.674          | -0.011 |
| 13 | 1  | -3 | 1 | 10.821         | 10.830          | -0.009 |
| 14 | -4 | 0  | 0 | 10.962         | 10.960          | 0.002  |
| 15 | -1 | -3 | 0 | 11.302         | 11.296          | 0.006  |
| 16 | 4  | -2 | 0 | 11.476         | 11.467          | 0.010  |
| 17 | -3 | 0  | 2 | 11.598         | 11.601          | -0.003 |
| 18 | 0  | 0  | 3 | 12.281         | 12.279          | 0.002  |

The worst reflection in the fit is the (211), which may be associated with a PbS reflection.

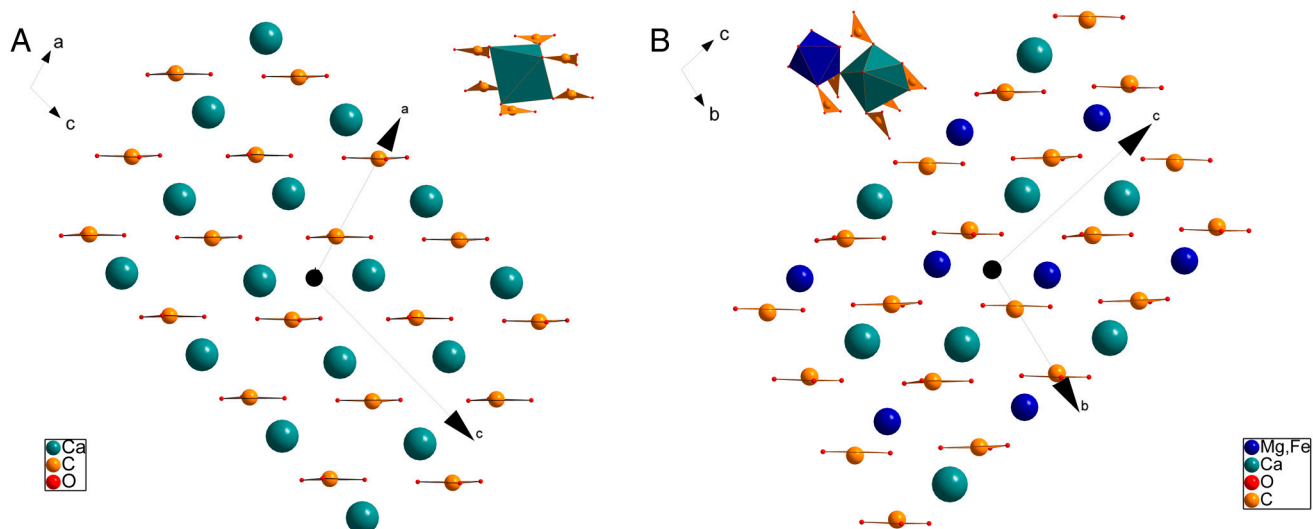

**Fig. S1.** Comparative crystal structures of  $\text{CaCO}_3$ -II (1) (*left*) and dolomite-II (*right*). Barring the different chemistries, the structures of dolomite-II and monoclinic calcite-II are essentially identical. The ordered substitution of  $(\text{Mg}_{0.6}\text{Fe}_{0.4})$  over one-half of the  $\text{Ca}^{2+}$  sites in calcite-II is sufficient on its own to reduce the overall symmetry of the unit cell to  $P\bar{1}$  and to result in a dolomite-II-like lattice and site distribution. Equally, the increase in multiplicity required by the site symmetry in the higher  $P2_1/c$  structure of calcite-II necessitates that all divalent cation sites are symmetrically (and chemically) equivalent. Other effects, such as the displacement of C from the  $\text{O}_3$  plane, as per  $\text{NaClO}_3$  (2) and also seen in dolomite-III, are insufficient to cause this reduction of lattice symmetry, while the atoms remain otherwise equivalent. The  $P\bar{1}$  symmetry of dolomite-II is also compatible with significant local distortion of the two dissimilar cation sites. As a consequence, dolomite-II presents two different coordinations: C.N. 8 for Ca site, and C.N. 6 for (Mg,Fe) sites.

- Merrill L, Bassett WA (1975) The crystal structure of  $\text{CaCO}_3$   $\delta$ III, a high-pressure metastable phase of calcium carbonate. *Acta Crystallogr* B31:343–349.
- Meyer D, Gasperin M (1973) Étude structurale d'une phase haute température instable du chlorate de sodium. [Structural study on a high-temperature instable phase of Sodium Chlorate]. *Bulletin de la Société Française de Minéralogie et Crystallographie* 96:18–20, French.

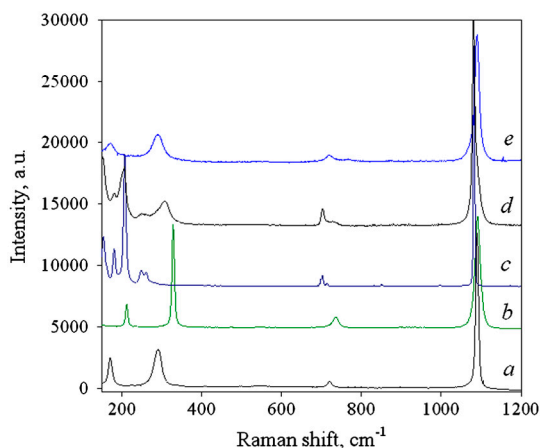

**Fig. S2.** Raman spectra from loadings of dolomite and other possible components: (A) starting material, dolomite  $\text{CaMg}_{0.6}\text{Fe}_{0.4}(\text{CO}_3)_2$ ; (B) magnesite  $\text{MgCO}_3$ ; (C) aragonite  $\text{CaCO}_3$ ; (D) material recovered after heating of dolomite at 26(1) GPa and 2050(100) K; and (E) material recovered after heating of dolomite at 72 (2) GPa and 2350(100) K. While laser heating at 26 GPa resulted in decomposition of the dolomite on  $\text{CaCO}_3$ -rich (recovered as aragonite) and  $\text{MgCO}_3$ -rich (recovered as magnesite) phases (spectrum "d"), heating at 72 GPa does not lead to decomposition (spectrum "e").
